# Supplementary material
Source: Royal Society of Chemistry journal article supplement (doi:10.1039/d6dt00892e)
Supplement: d6dt00892e1.pdf [file d6dt00892e1.pdf]

## Supporting Information

### Hollow N-Doped Carbon Nanocages Anchoring Ni-Ru Bimetallic Nanoparticles for Enhanced Peroxidase-like Activity

Yuyao Li<sup>a</sup>, Yan Chen<sup>a</sup>, Suping Han<sup>\*b</sup>, Jingli Xu<sup>a</sup>, Xue-Bo Yin<sup>a</sup>, Min Zhang<sup>\*a</sup>

<sup>a</sup> College of Chemistry and Chemical Engineering, Shanghai University of Engineering Science, Shanghai 201620, China, zhangmin@sues.edu.cn.

<sup>b</sup> Department of Pharmacy, Shandong Medical College., No. 5460 Erhuannanlu Road, Jinan 250002, China, supinghan@163.com.

\*Corresponding author: (zhangmin@sues.edu.cn. Min Zhang), supinghan@163.com (Suping Han)

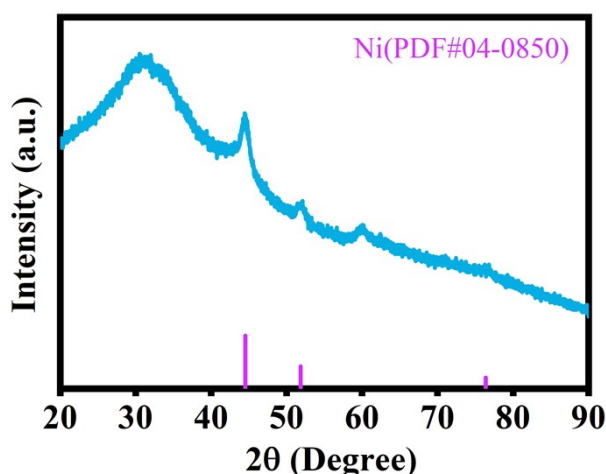

Fig. S1 XRD patterns of Ni@HNCs

**Table S1.** Comparison of  $K_m$  and  $V_m$  between Ni/Ru@HNCs and other materials

| Catalyst            | $K_m$ [mM] |                               | $V_{max}$ [ $10^{-8}Ms^{-1}$ ] |                               | Ref.      |
|---------------------|------------|-------------------------------|--------------------------------|-------------------------------|-----------|
|                     | TMB        | H <sub>2</sub> O <sub>2</sub> | TMB                            | H <sub>2</sub> O <sub>2</sub> |           |
| Ru/Ni-HNCs          | 0.066      | 0.014                         | 8.55                           | 9.17                          | This work |
| Ru/CeO <sub>2</sub> | 0.053      | 2.68                          | 26.01                          | 3.03                          | [1]       |
| Ru/PC               | 0.071      | 0.969                         | 2.285                          | 1.79                          | [2]       |
| Ru NPs              | 0.234      | 2.206                         | 8.25                           | 58.2                          | [3]       |
| HRP                 | 0.43       | 3.70                          | 10.00                          | 8.71                          | [4]       |

**Table S2.** Comparison of colorimetric detection of TP based on TMB

| Nanocomposite            | Linear range[ $\mu\text{M}$ ] | Detection limit[ $\mu\text{M}$ ] | Ref.      |
|--------------------------|-------------------------------|----------------------------------|-----------|
| Ru/Ni-HNCs               | 0.2-2.1                       | 0.04                             | This work |
| Fe <sub>3</sub> C/Fe-N-C | 0.22-4.36                     | 0.24                             | [5]       |
| carbon dots              | 21.8-218                      | 3.51                             | [6]       |
| AuNPs                    | 34.5–1034                     | 26.2                             | [7]       |
| Rh-Au                    | 1-10                          | 1                                | [8]       |
| Fe-CDs                   | 2.18-218.16                   | 0.1                              | [9]       |

## References

- [1] Chu Y, Cao B, Wang Y, et al. Ru doping enhance the peroxidase-like activity of CeO<sub>2</sub> nanorods and application for cysteine determination at physiological temperature[J]. *Colloids and Surfaces A: Physicochemical and Engineering Aspects*, 2023, 679: 132581.
- [2] Feng S, Ming M, Wang M, et al. Uniformly distributed ruthenium nanocrystals as highly efficient peroxidase for hydrogen peroxide colorimetric detection and nitroreductase for 4-nitroaniline reduction[J]. *Chemical Communications*, 2020, 56(82): 12347-12350.
- [3] Cao G J, Jiang X, Zhang H, et al. Mimicking horseradish peroxidase and oxidase using ruthenium nanomaterials[J]. *RSC advances*, 2017, 7(82): 52210-52217.
- [4] Gao L, Zhuang J, Nie L, et al. Intrinsic peroxidase-like activity of ferromagnetic nanoparticles[J]. *Nature nanotechnology*, 2007, 2(9): 577-583.
- [5] Xiu-Ping W U, Zhi-Cheng W, Dong-Yan L I. Fabrication of Fe<sub>3</sub>C/Fe-NC nanozymes-based cascade colorimetric sensor for detection and discrimination of tea polyphenols[J]. *Chinese Journal of Analytical Chemistry*, 2023, 51(4): 100243.
- [6] Wei Q, Liu T, Pu H, et al. Development of a fluorescent microwave-assisted synthesized carbon dots/Cu<sup>2+</sup> probe for rapid detection of tea polyphenols[J]. *Journal of Food Process Engineering*, 2020, 43(7): e13419.
- [7] Yang X, Bi Z, Yin C, et al. A colorimetric sensor array based on peroxidase activity nanozyme for the highly efficient differential sensing of tea polyphenols and Tieguanyin adulteration[J]. *Food Chemistry*, 2024, 432: 137265.
- [8] Long W, Wang S, Ling Y, et al. A nanozyme colorimetric sensor combined with cloud-based machine learning algorithm-assisted WeChat mini program for intelligent identification of Chinese green tea[J]. *Food Research International*, 2025: 116668.
- [9] Zheng Y, Yan W, Li N, et al. Unveiling a novel nanozyme cofactor: a highly activated Fe-CDs-derived colorimetric sensor array for comprehensive authentication of diverse tea products[J]. *Biosensors and Bioelectronics*, 2025: 117510.
